# Supplementary material for: Tumor Infiltration Levels of CD3, Foxp3 (+) Lymphocytes and CD68 Macrophages at Diagnosis Predict 5-Year Disease-Specific Survival in Patients with Oropharynx Squamous Cell Carcinoma
Source: MDPI journal article supplement (doi:10.3390/cancers14061508), 2022-03-15
Supplement: s1 [file s1]

## Supplementary Information

# Tumor Infiltration Levels of CD3, Foxp3 (+) Lymphocytes and CD68 Macrophages at Diagnosis Predict 5-year Disease-specific survival in Patients with Oropharynx Squamous Cell Carcinoma

**Table S1. Histological grading of the tumors by Kristensen.** Scoring system previously published [24, 28].

|                                  |                          | HPV(-)<br><i>n</i> patients | HPV(+)<br><i>n</i> patients | Statistics HPV(-) vs. HPV(+)<br><i>p</i> -Value |
|----------------------------------|--------------------------|-----------------------------|-----------------------------|-------------------------------------------------|
| Keratinization                   |                          |                             |                             |                                                 |
| 1                                | >50%                     | 9                           | 2                           | <0.001                                          |
| 2                                | 20-50%                   | 18                          | 7                           |                                                 |
| 3                                | 5-20%                    | 23                          | 17                          |                                                 |
| 4                                | 0-5%                     | 15                          | 57                          |                                                 |
| Cancer cell nuclear polymorphism |                          |                             |                             |                                                 |
| 1                                | >75%                     | 7                           | 1                           | <0.001                                          |
| 2                                | 50-75%                   | 11                          | 2                           |                                                 |
| 3                                | 25-50%                   | 28                          | 17                          |                                                 |
| 4                                | 0-25%                    | 19                          | 63                          |                                                 |
| Invasion                         |                          |                             |                             |                                                 |
| 1                                | Pushing                  | 1                           | 20                          | <0.003                                          |
| 2                                | Infiltrating solid cords | 22                          | 39                          |                                                 |
| 3                                | Infiltrating cells       | 24                          | 17                          |                                                 |
| 4                                | Widespread               | 18                          | 7                           |                                                 |
| Inflammatory response            |                          |                             |                             |                                                 |
| 1                                | Marked                   | 9                           | 31                          | <0.001                                          |
| 2                                | Moderate                 | 11                          | 32                          |                                                 |
| 3                                | Slight                   | 39                          | 16                          |                                                 |
| 4                                | None                     | 6                           | 4                           |                                                 |
| Stromal desmoplasia              |                          |                             |                             |                                                 |
| 1                                | None                     | 9                           | 34                          | <0.001                                          |
| 2                                | Slight                   | 17                          | 23                          |                                                 |
| 3                                | Moderate                 | 22                          | 21                          |                                                 |
| 4                                | Marked                   | 17                          | 5                           |                                                 |

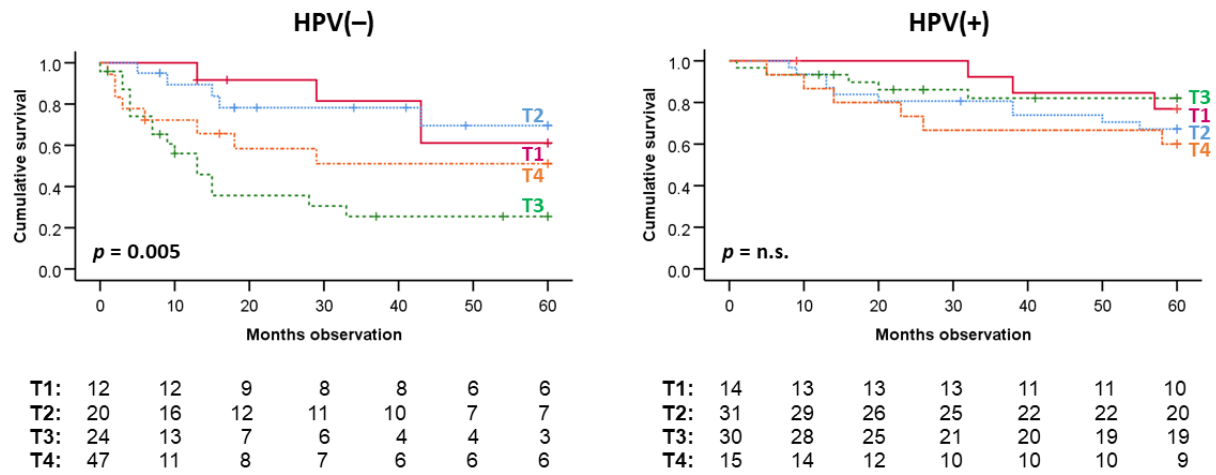

**Figure S1. Five year DSS by T stage divided into tumor HPV categories.** PCR determined HPV status and T stage from the international cancer union classification. Survival curves and statistics by Kaplan-Meier plot and Log-rank tests.

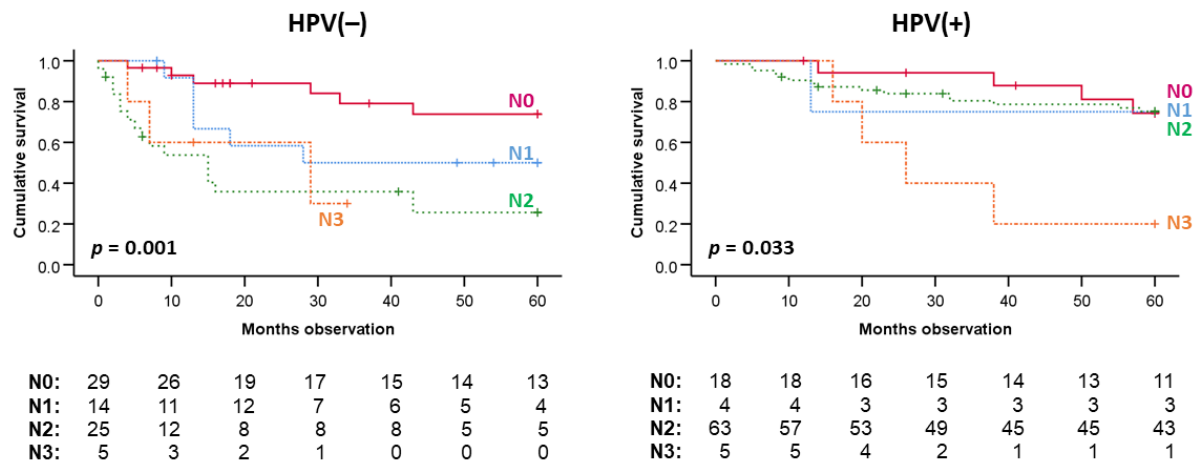

**Figure S2. Five year DSS by N stage divided into tumor HPV categories.** PCR determined HPV status and T stage from the international cancer union classification. Survival curves and statistics by Kaplan-Meier plot and Log-rank tests.
